# Supplementary material for: Localized redox relays as a privileged mode of cytoplasmic hydrogen peroxide signaling
Source: PubMed Central journal article supplement (PMC5339411; doi:10.1016/j.redox.2017.01.003), 2017-01-06
Supplement: mmc1.pdf [file mmc1.pdf]

Supplementary Information for

R.D.M. Travasso, F. Sampaio dos Aidos, A. Bayani, P. Abranches, A. Salvador.

“Localized Redox Relays as a Privileged Mode of Cytoplasmic Hydrogen Peroxide Signaling”

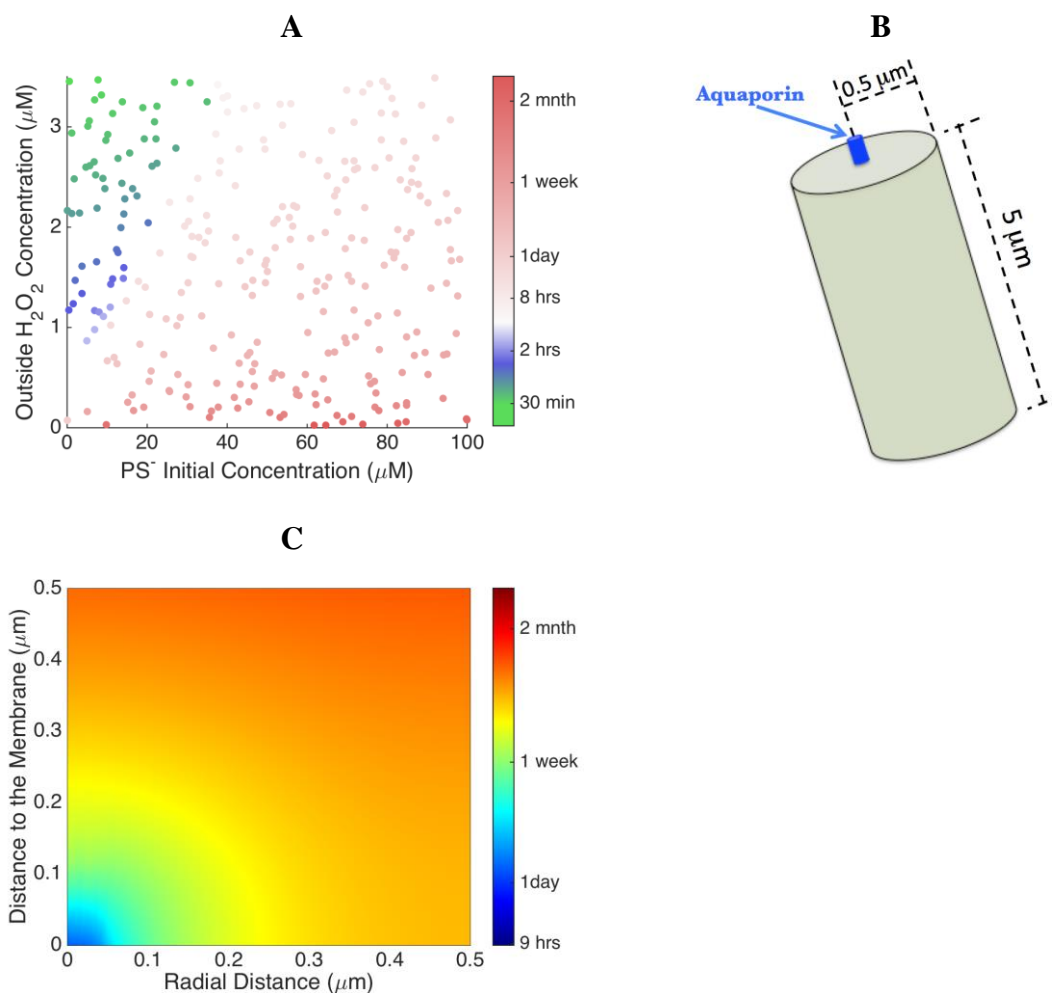

**Figure S1.  $\text{H}_2\text{O}_2$  capacity for signaling under various conditions.** **A:** Minimum time scale for direct oxidation of PTPs by  $\text{H}_2\text{O}_2$  for a condensation rate constant  $k_4 = 88.7 \text{ s}^{-1}$ , as estimated for peroxiredoxin I [1]. **B:** Scheme for the 3D simulation box near a membrane channel. **C:** Time scale for direct oxidation of a PTP reacting with  $\text{H}_2\text{O}_2$  with a  $164 \text{ M}^{-1}\text{s}^{-1}$  rate constant near a channel concentrating all the permeation rate of the membrane into a 50 nm diameter for an extracellular  $\text{H}_2\text{O}_2$  concentration  $c_H^0 = 0.40 \mu\text{M}$  and  $c_{\text{PS}^-}(0) = 80 \mu\text{M}$ .

## Reference

1. Selvaggio, G., Oliveira, V., Coelho, P. M. B. M., and Salvador, A. (2017) "Mapping the phenotypic repertoire of the cytoplasmic 2-Cys peroxiredoxin - thioredoxin system. 1. Design principles for effective analogic signaling." (submitted for publication).

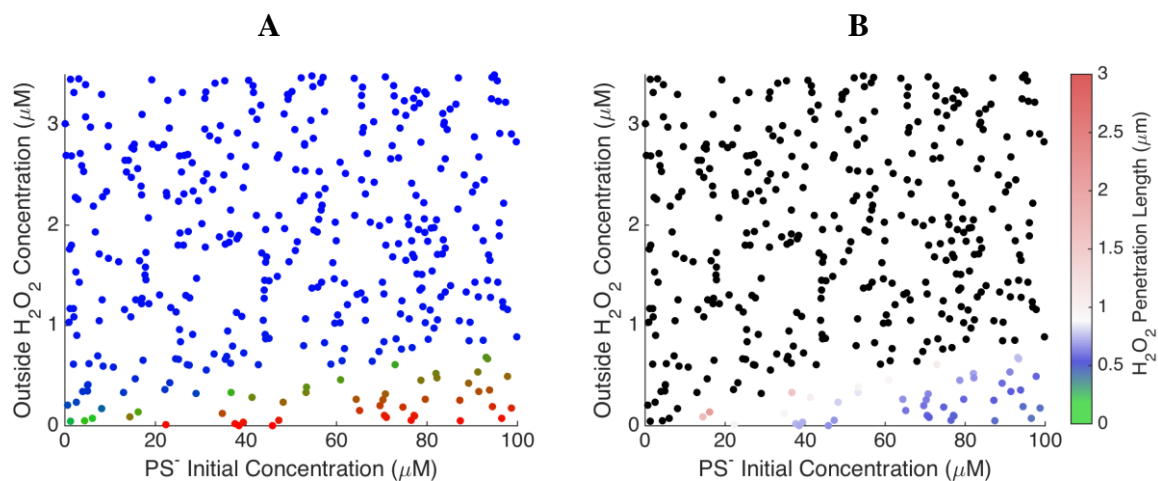

**Figure S2. Dynamics of the system at low PSS reduction capacity. A:** Ratio between the average concentration of the various forms of peroxiredoxin and the initial concentration of PS<sup>-</sup> for  $c_{Trx} = 1 \mu\text{M}$ . Each point is colored according to the relative fractions of peroxiredoxin in each form following the same convention as in Figure 3D. Peroxiredoxins accumulate in disulfide form at high extracellular H<sub>2</sub>O<sub>2</sub> concentrations. **B:** H<sub>2</sub>O<sub>2</sub> penetration length for  $c_{Trx} = 1 \mu\text{M}$ . Accumulation of the peroxiredoxins in disulfide form causes the cytoplasmic H<sub>2</sub>O<sub>2</sub> concentration gradient to flatten out.

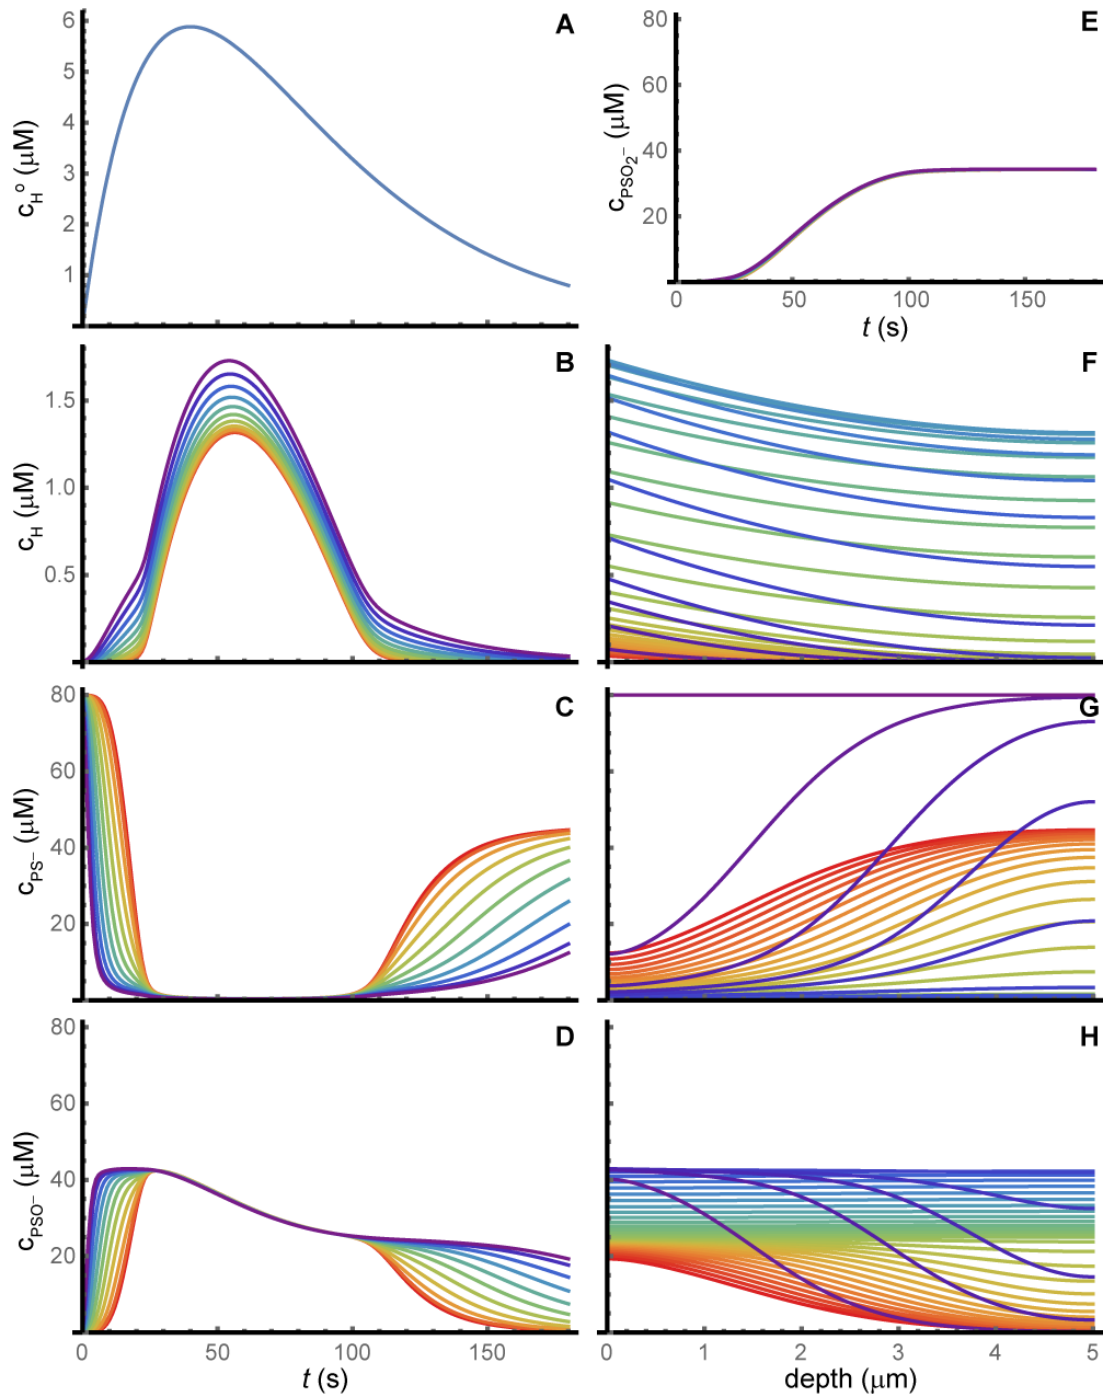

**Figure S3. Response to extracellular 6  $\mu\text{M}$   $\text{H}_2\text{O}_2$  pulses.** **A:** Time course of the pulse. **B-E:** Time course of cytoplasmic concentrations of  $\text{H}_2\text{O}_2$ ,  $\text{PS}^-$ ,  $\text{PSO}^-$ , and  $\text{PSO}_2^-$ , respectively, at depths 0 (violet) to 5  $\mu\text{m}$  (red) from the membrane (0.5  $\mu\text{m}$  steps). **F-H:** Spatial profiles of cytoplasmic concentrations of  $\text{H}_2\text{O}_2$ ,  $\text{PS}^-$ , and  $\text{PSO}^-$ , respectively, at times 0 (violet) to 180 s (red) from the membrane (5 s steps). The violet lines in panels E-G reflect the initial concentration change over depth. The time courses and spatial profiles for PSS are very similar to those for  $\text{PSO}^-$ . Note the different scales for extracellular  $\text{H}_2\text{O}_2$ , cytoplasmic  $\text{H}_2\text{O}_2$  and peroxiredoxin concentrations.

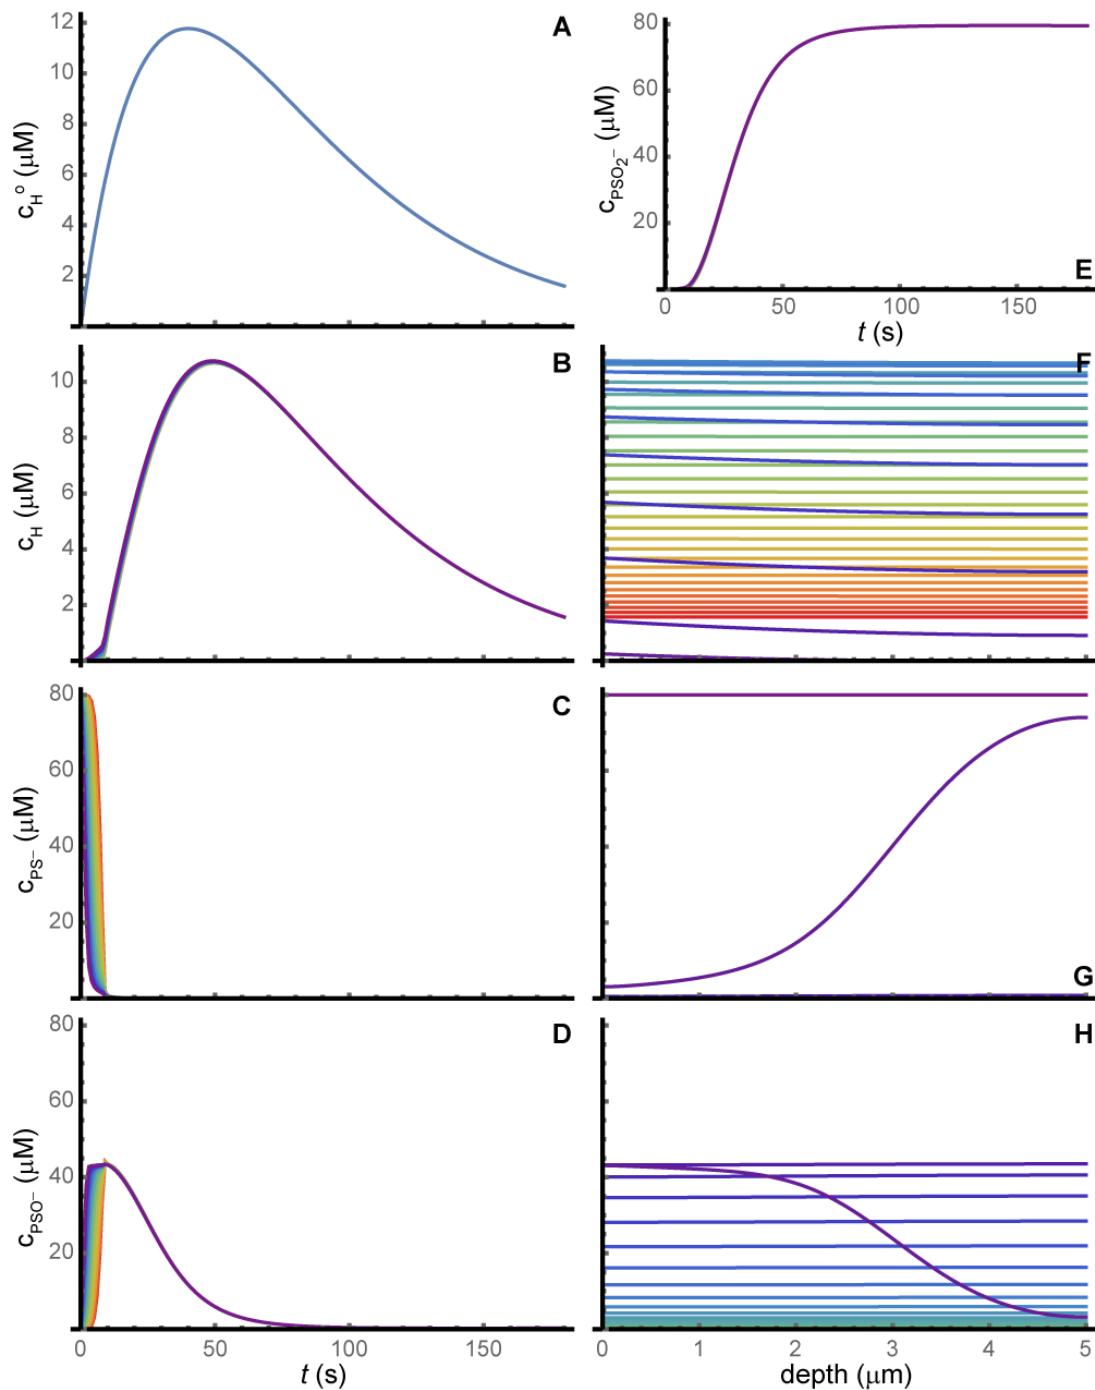

**Figure S4. Response to extracellular 12  $\mu M$   $H_2O_2$  pulses.** **A:** Time course of the pulse. **B-E:** Time course of cytoplasmic concentrations of  $H_2O_2$ ,  $PS^-$ ,  $PSO^-$ , and  $PSO_2^-$ , respectively, at depths 0 (violet) to 5  $\mu m$  (red) from the membrane (0.5  $\mu m$  steps). **F-H:** Spatial profiles of cytoplasmic concentrations of  $H_2O_2$ ,  $PS^-$ , and  $PSO^-$ , respectively, at times 0 (violet) to 180 s (red) from the membrane (5 s steps). The violet lines in panels E-G reflect the initial concentration change over depth. The time courses and spatial profiles for PSS are very similar to those for  $PSO^-$ . Note the different scales for extracellular  $H_2O_2$ , cytoplasmic  $H_2O_2$  and peroxiredoxin concentrations.
